# Supplementary material for: Integration of Ag/AgCl and Au nanoparticles into isostructural porous coordination polymers of Ni(ii), Co(ii) and Mn(ii): magnetic studies
Source: Royal Society of Chemistry journal article supplement (doi:10.1039/c6ra26642h), 2017-01-01
Supplement: c6ra26642h1.pdf [file c6ra26642h1.pdf]

## Integration of Ag/AgCl and Au Nanoparticles in Isostructural Porous Coordination Polymers of Ni(II), Co(II) and Mn(II): Magnetic Studies

Rashmi A. Agarwal<sup>\*a</sup>, Neeraj K. Gupta<sup>b</sup>

<sup>\*a</sup>*Department of Chemistry, Indian Institute of Technology Kanpur, Uttar Pradesh 208016, India*

<sup>b</sup>*Department of Mechanical Engineering, Indian Institute of Technology Kanpur, Uttar Pradesh 208016, India*

### Supporting information

**Table S1.** Varying potential of supramolecular interactions in host PCPs.

| Host PCPs     | $\pi$ - $\pi$ bonding in cavity (Å) | Hydrogen bonding with anion (Å) | Metal to anion distance (Å) | Anion- $\pi$ interaction (Å) |
|---------------|-------------------------------------|---------------------------------|-----------------------------|------------------------------|
| <b>Ni-PCP</b> | 3.272–3.374                         | 2.398–2.864                     | 4.870                       | 3.705                        |
| <b>Co-PCP</b> | 3.172–3.325                         | 2.426–2.930                     | 4.908                       | 3.748                        |
| <b>Mn-PCP</b> | 3.505–3.618                         | 2.480–2.888                     | 4.992                       | 3.838                        |

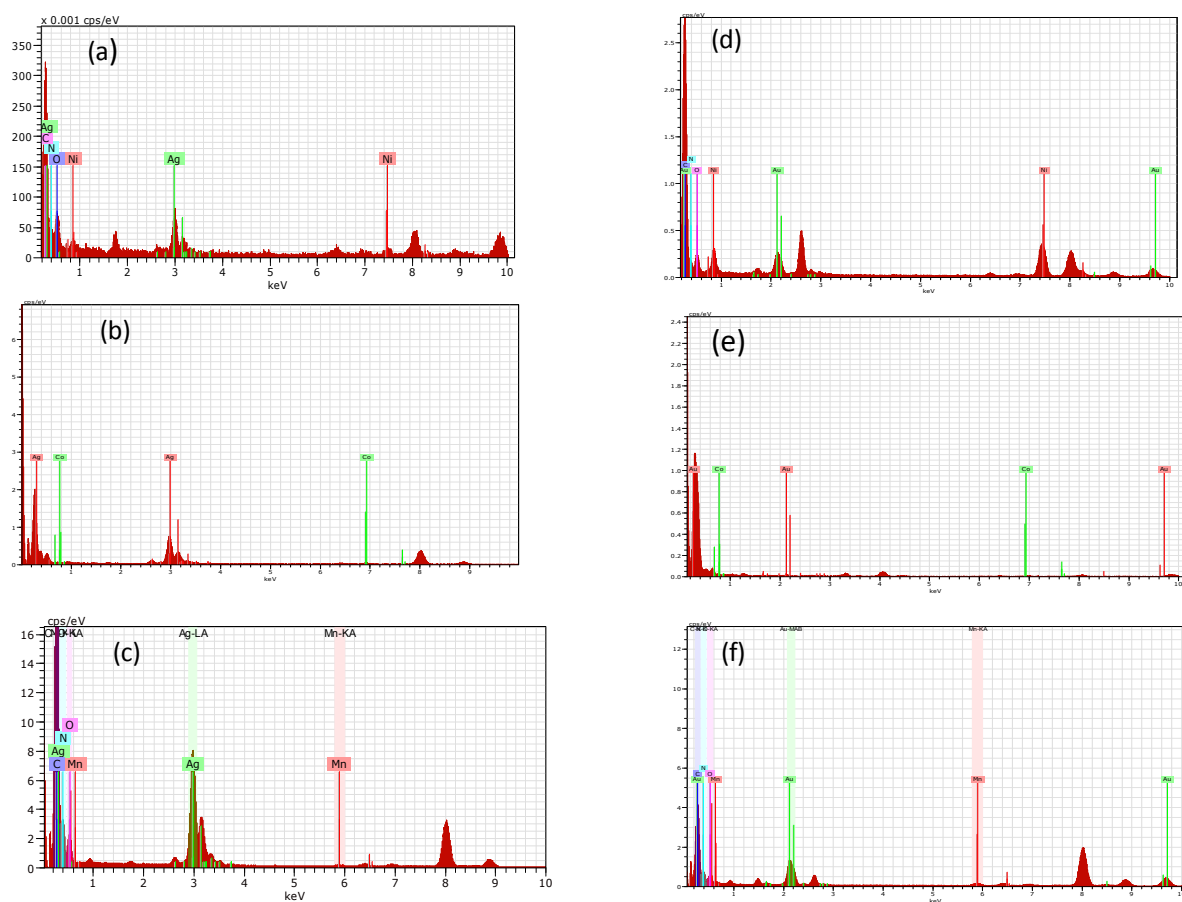

**Fig. S1** EDS of (a) Ag/AgCl@Ni-PCP, (b) Ag/AgCl@Co-PCP, (c) Ag/AgCl@Mn-PCP (d) Au@Ni-PCP, (e) Au@Co-PCP, and (f) Au@Mn-PCP.

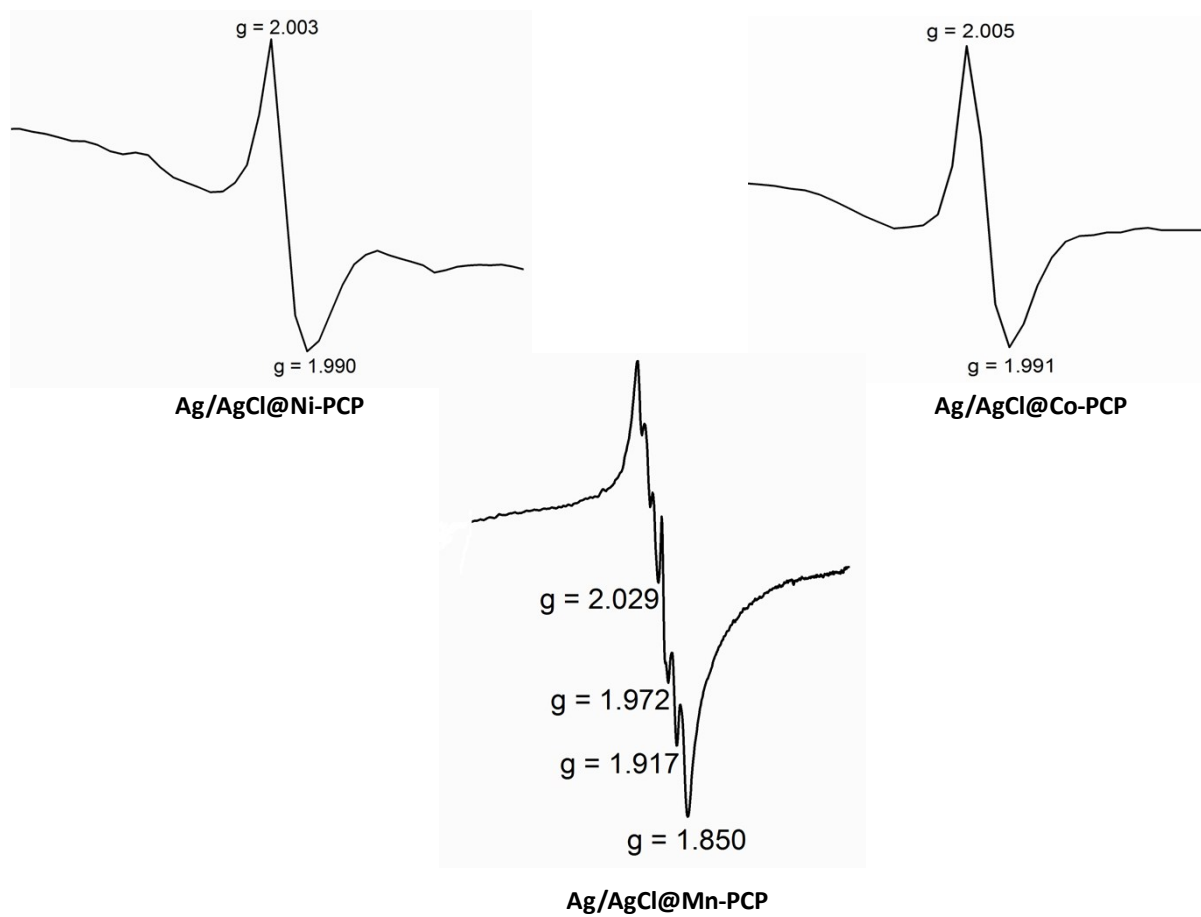

**Fig. S2** EPR spectra of Ag/AgCl integrated PCPs.

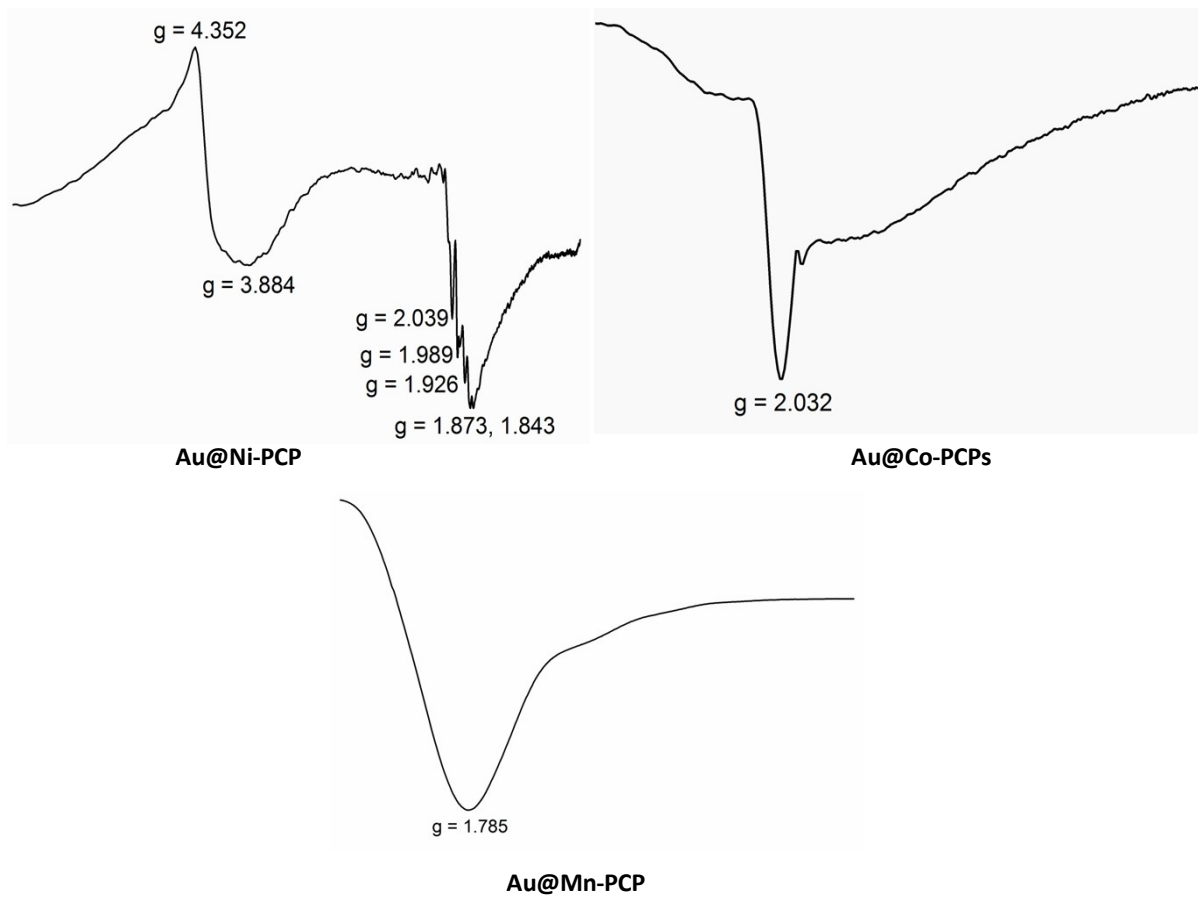

**Fig. S3** EPR spectra of Au(0) integrated PCPs.

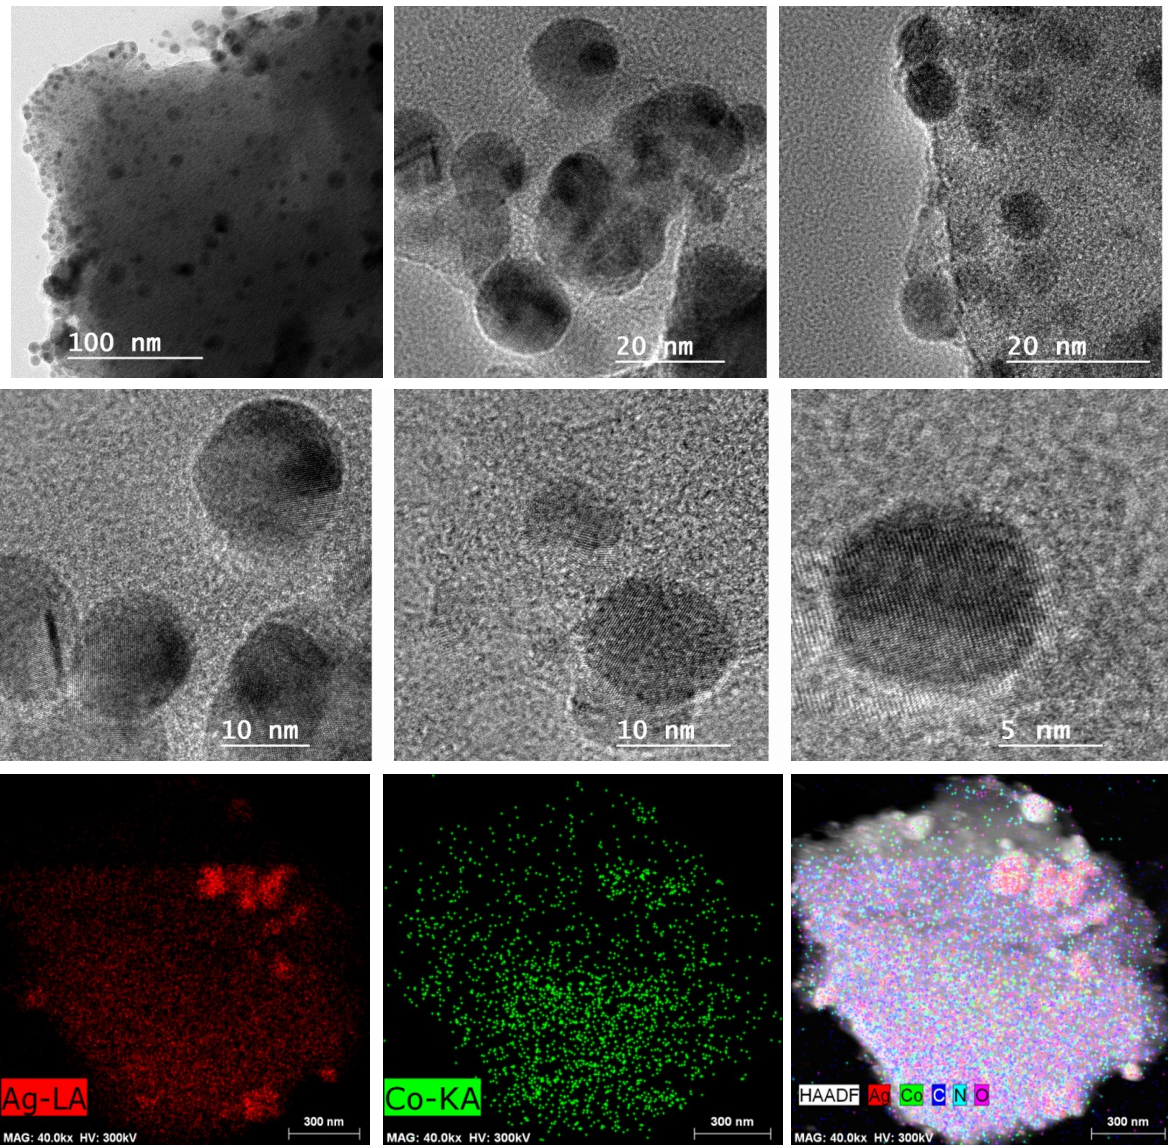

**Fig. S4** HRTEM and HAADF-STEM images of Ag/AgCl@Co-PCP.

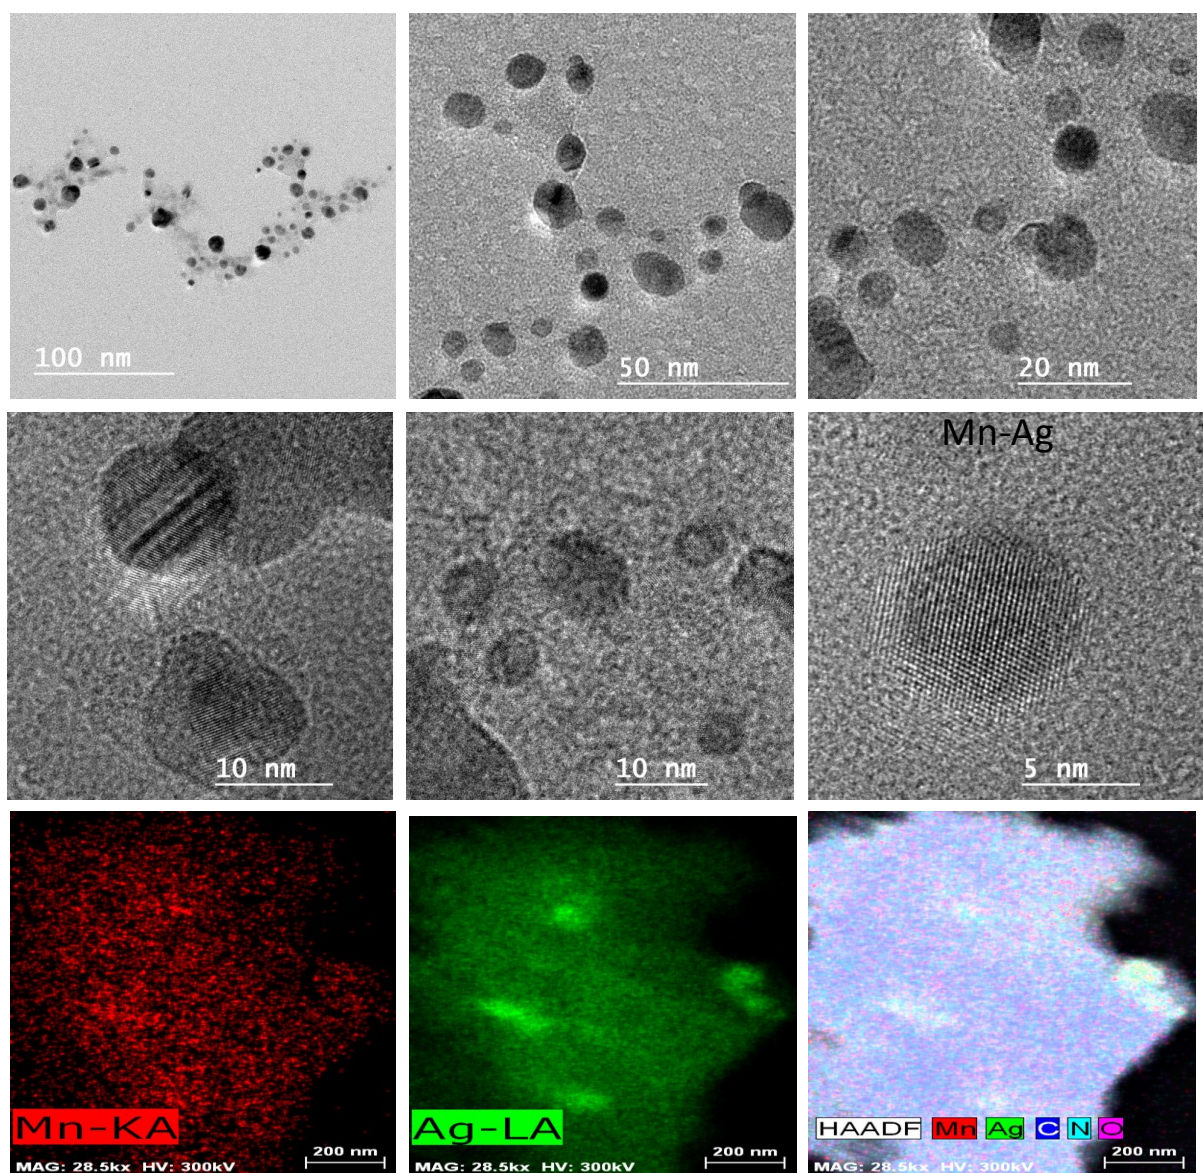

**Fig. S5** HRTEM and HAADF-STEM images of Ag/AgCl@Mn-PCP.

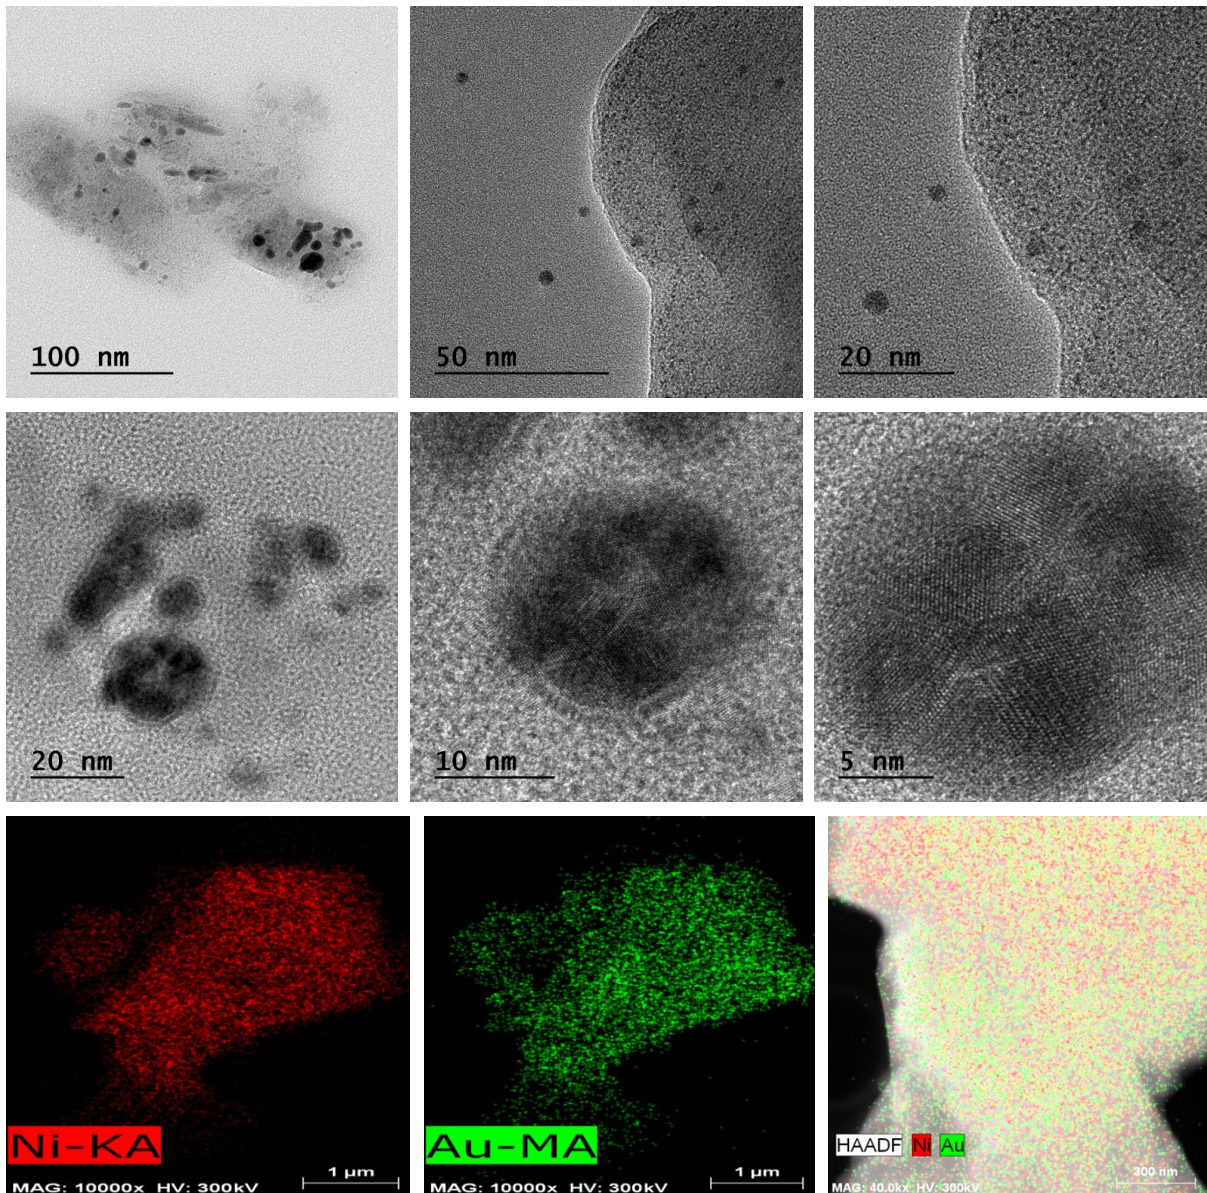

**Fig. S6** HRTEM and HAADF-STEM images of Au@Ni-PCP.

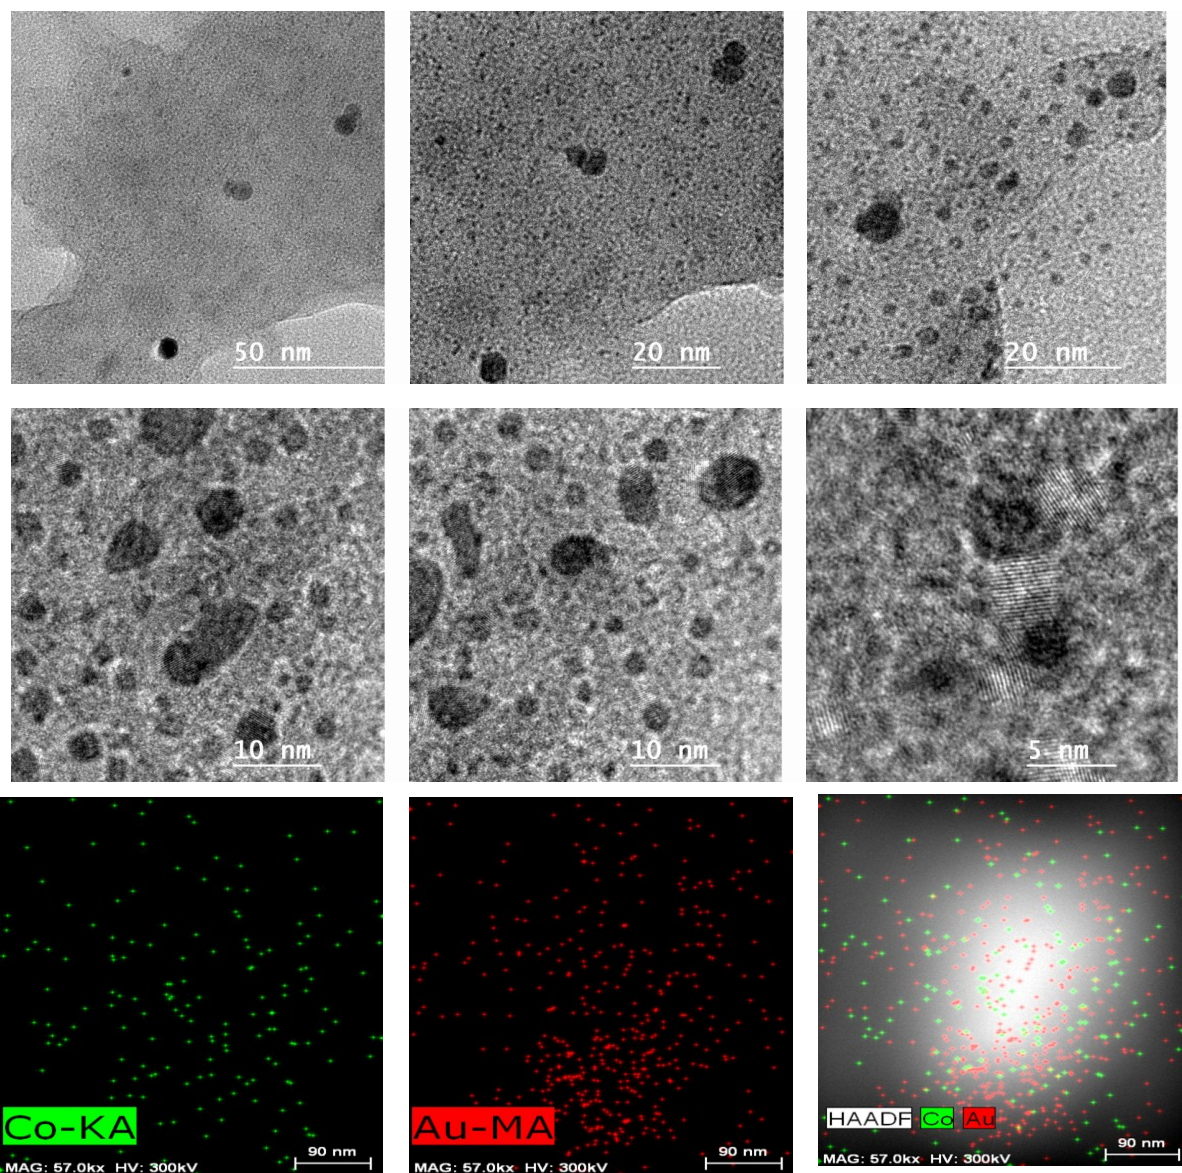

**Fig. S7** HRTEM and HAADF-STEM images of Au@Co-PCP.



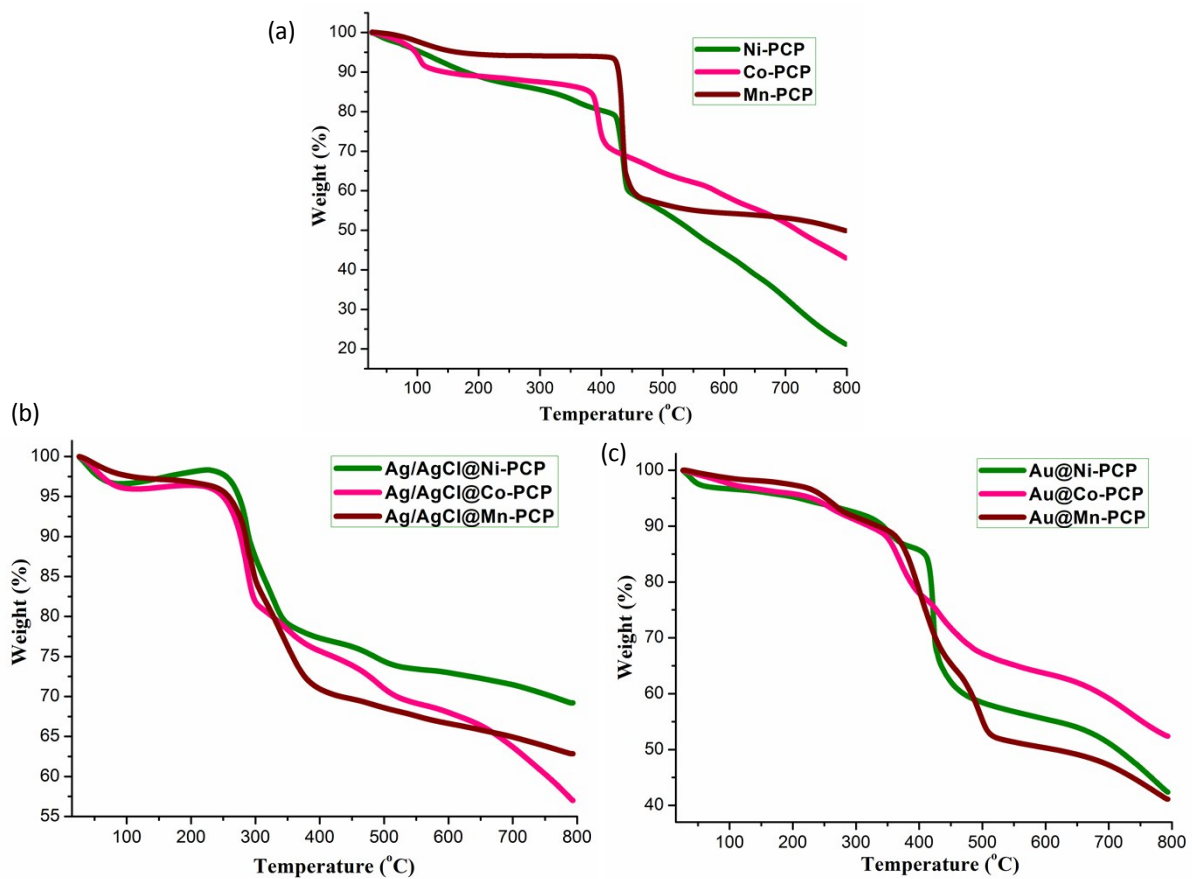

**Fig. S8** TGA plots of (a) host PCPs, (b) Ag/AgCl integrated PCPs and (c) Au(0) integrated PCPs.
